# Supplementary material for: ApoM regulates PFKL through the transcription factor SREBF1 to inhibit the proliferation, migration and metastasis of liver cancer cells
Source: PubMed Central journal article supplement — Oncol Lett. 2022 May 16;24(1):210. doi: 10.3892/ol.2022.13331 (PMC9178675; doi:10.3892/ol.2022.13331), 2022-05-16
Supplement: Supplementary_Data2.pdf [file Supplementary_Data2.pdf]

Table SI. Comparison of SREBF gene expression between the apolipoprotein M low vs. high expression groups of patients with hepatocellular carcinoma.

| Gene_name | Gene_id         | log2(fold change) | P-value |
|-----------|-----------------|-------------------|---------|
| SREBF1    | ENSG00000072310 | 0.255             | 0.02    |
| SREBF2    | ENSG00000198911 | 0.053             | 0.47    |

SREBF1, sterol regulatory element-binding protein 1 (also known as SREBP1).
